# Supplementary material for: Co-Sensitization Effects of Indoline and Carbazole Dyes in Solar Cells and Their Neutral–Anion Equilibrium in Solution
Source: MDPI journal article supplement (doi:10.3390/ma15217725), 2022-11-02
Supplement: s1 [file s1]

## Supplementary Materials

### Co-Sensitization Effects of Indoline and Carbazole Dyes in Solar Cells and Their Neutral–Anion Equilibrium in Solution

Mateusz Gierszewski \*, Adam Glinka and Marcin Ziółek \*

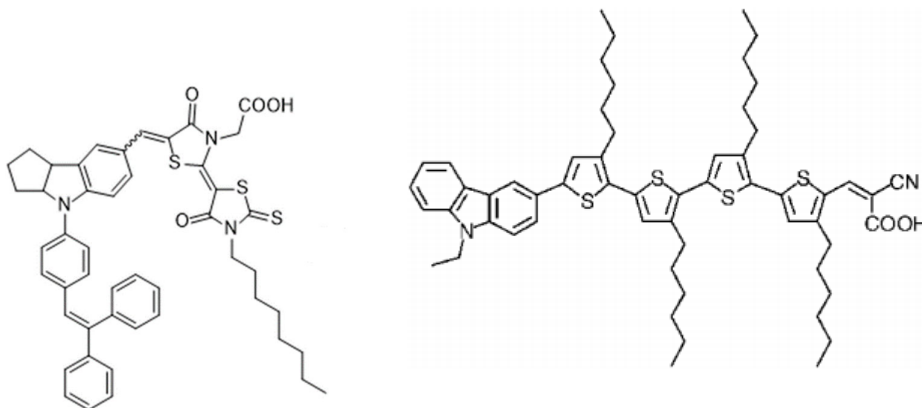

**Figure S1.** Scheme of D205 (left) and MK2 (right) dyes.

**Table S1.** Photovoltaic parameters for the cells: TiO<sub>2</sub> layer from doctor blade with P25 paste, no TiCl<sub>4</sub> treatment, electrolyte: iodide with 0.5 TBP.

| Sample         | V <sub>oc</sub> , V | FF   | J <sub>sc</sub> , mA/cm <sup>2</sup> | PCE, % | Total_APCE |
|----------------|---------------------|------|--------------------------------------|--------|------------|
| D205           | 0.67                | 0.58 | 5.87                                 | 2.30   | 0.42       |
| MK2            | 0.70                | 0.52 | 7.21                                 | 2.64   | 0.49       |
| D205:MK2 1:1.5 | 0.69                | 0.52 | 8.27                                 | 2.96   | 0.55       |
| D205:MK2 1:3.2 | 0.69                | 0.57 | 8.79                                 | 3.43   | 0.51       |

**Table S2.** Photovoltaic parameters for the cells: TiO<sub>2</sub> layer 2.5 μm from screen-printed 30TS paste, Dyenamo, no TiCl<sub>4</sub> treatment, electrolyte: iodide without TBP.

| Sample         | V <sub>oc</sub> , V | FF   | J <sub>sc</sub> , mA/cm <sup>2</sup> | PCE, % | Total_APCE |
|----------------|---------------------|------|--------------------------------------|--------|------------|
| D205           | 0.68                | 0.54 | 9.01                                 | 3.29   | 0.75       |
| MK2            | 0.64                | 0.43 | 9.83                                 | 2.70   | 0.79       |
| D205:MK2 1:1.5 | 0.67                | 0.51 | 9.02                                 | 3.06   | 0.69       |
| D205:MK2 1:3.2 | 0.65                | 0.47 | 9.01                                 | 2.78   | 0.69       |

**Table S3.** Photovoltaic parameters for the cells: TiO<sub>2</sub> layer 2.5 μm from screen-printed 30TS paste, Dyenamo, electrolyte Co-Phen, the best cell.

| Sample       | V <sub>oc</sub> , V | FF   | J <sub>sc</sub> , mA/cm <sup>2</sup> | PCE, % | Total_APCE |
|--------------|---------------------|------|--------------------------------------|--------|------------|
| D205         | 0.82                | 0.75 | 3.67                                 | 2.24   | 0.33       |
| MK2          | 0.84                | 0.63 | 8.03                                 | 4.30   | 0.69       |
| D205:MK2 1:2 | 0.82                | 0.75 | 4.26                                 | 2.64   | 0.37       |

**Table S4.** Photovoltaic parameters for the cells: TiO<sub>2</sub> layer 1.5 μm from screen-printed diluted 30TS paste, Dyenamo, electrolyte Co-Phen, the best cell.

| Sample       | V <sub>oc</sub> , V | FF   | J <sub>sc</sub> , mA/cm <sup>2</sup> | PCE, % | Total_APCE |
|--------------|---------------------|------|--------------------------------------|--------|------------|
| D205         | 0.84                | 0.76 | 3.61                                 | 2.3    | 0.41       |
| MK2          | 0.88                | 0.68 | 7.44                                 | 4.44   | 0.70       |
| D205:MK2 1:2 | 0.84                | 0.74 | 4.18                                 | 2.59   | 0.40       |

**Table S5.** Photovoltaic parameters for the cells: TiO<sub>2</sub> layer 12 μm from screen-printed 18NRT, Dyesol, electrolyte Co-Bpy, the best cell.

| Sample         | V <sub>oc</sub> , V | FF   | J <sub>sc</sub> , mA/cm <sup>2</sup> | PCE, % | Total_APCE |
|----------------|---------------------|------|--------------------------------------|--------|------------|
| D205           | 0.76                | 0.75 | 5.22                                 | 2.97   | 0.32       |
| MK2            | 0.75                | 0.71 | 5.96                                 | 3.14   | 0.35       |
| D205:MK2 1:4.2 | 0.74                | 0.75 | 6.78                                 | 3.76   | 0.41       |

**Table S6.** Photovoltaic parameters for the cells: TiO<sub>2</sub> layer 6 μm from screen-printed 30NRD, Dyesol, electrolyte Co-Bpy, the best cell.

| Sample         | V <sub>oc</sub> , V | FF   | J <sub>sc</sub> , mA/cm <sup>2</sup> | PCE, % | Total_APCE |
|----------------|---------------------|------|--------------------------------------|--------|------------|
| D205           | 0.75                | 0.67 | 5.88                                 | 2.95   | 0.41       |
| MK2            | 0.79                | 0.68 | 9.53                                 | 5.16   | 0.68       |
| D205:MK2 1:4.2 | 0.77                | 0.71 | 8.33                                 | 4.58   | 0.55       |

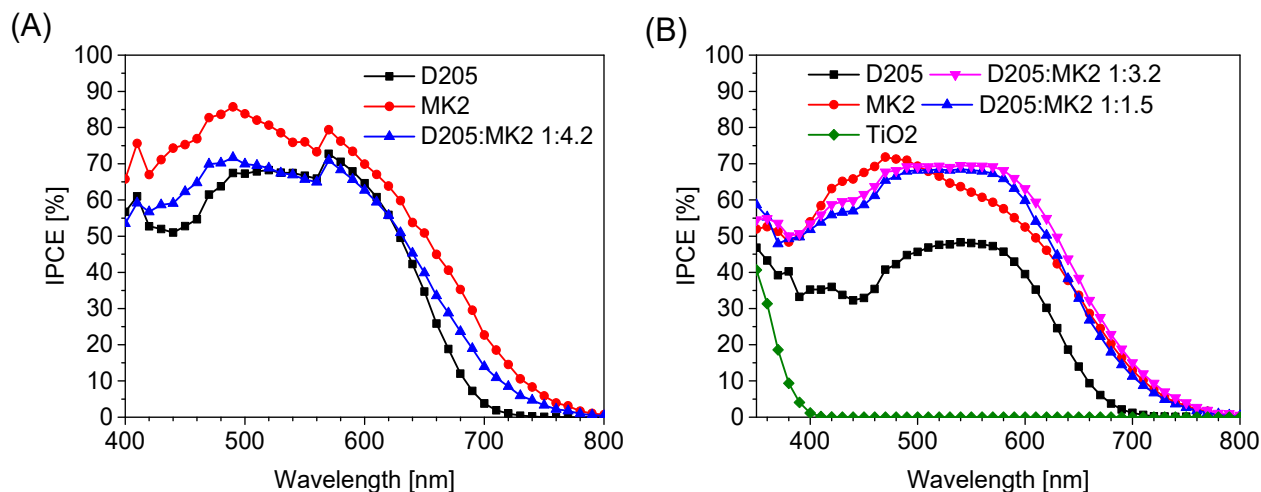

**Figure S2.** Exemplary IPCE spectra of pure D205, pure MK2 and a mixture of the two dyes. The cell configuration corresponds to that of Table 2 (A) and Table S1 (B).

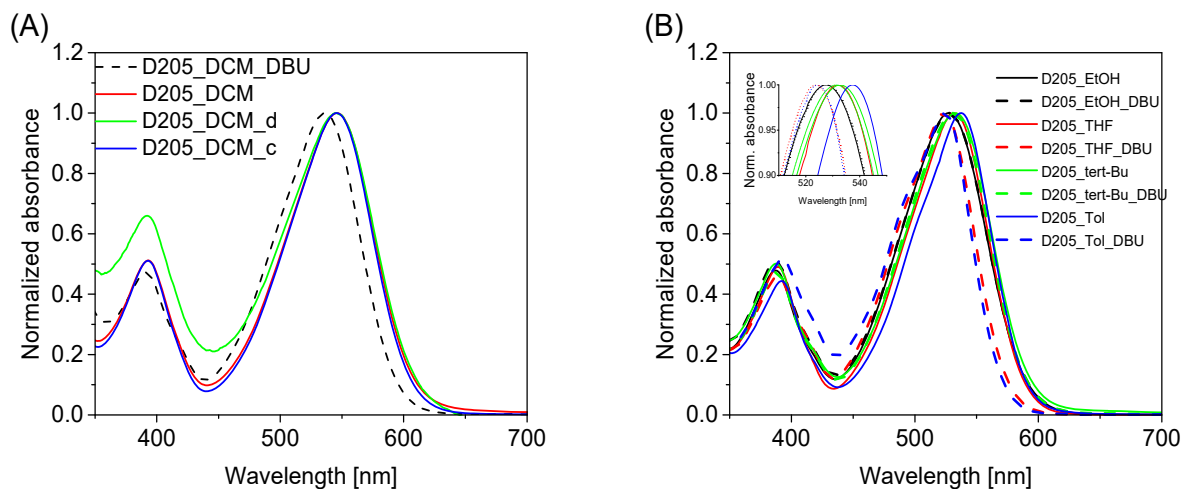

**Figure S3.** Absorption spectra of D205: (A) in DCM at different concentrations or with addition of DBU, (B) in different organic solvents ( $c \sim 10^{-5}$  M) with or without addition of DBU.

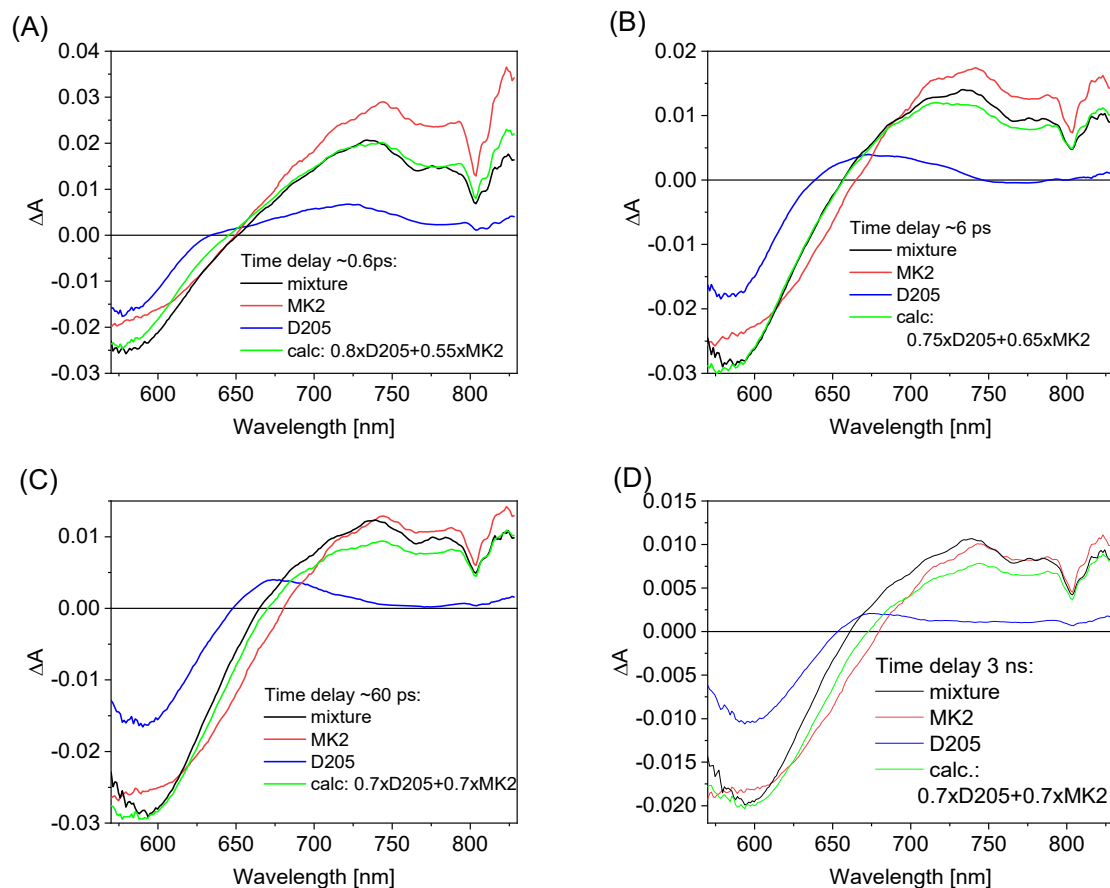

**Figure S4.** Transient absorption spectra at a given time delay between pump and probe pulse of D205 and MK2 and their mixtures.

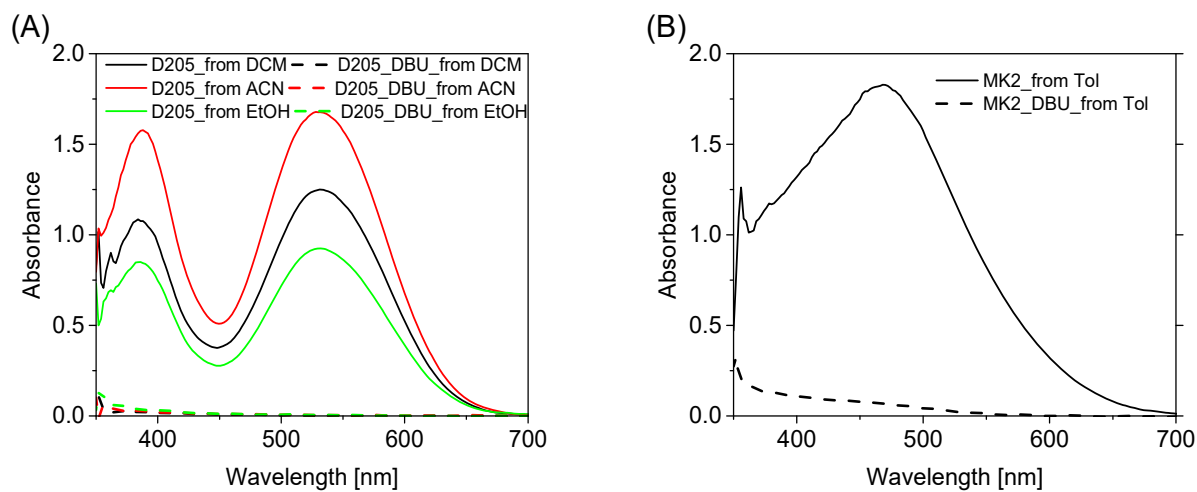

**Figure S5.** Absorption spectra of D205 from the solutions in DCM, ACN and EtOH, sensitized on the  $\text{TiO}_2$  surface along with those recorded after addition of DBU (A); the absorption spectra of MK2 from the solutions in Tol, sensitized on the  $\text{TiO}_2$  surface along with those recorded after the addition of DBU (B).

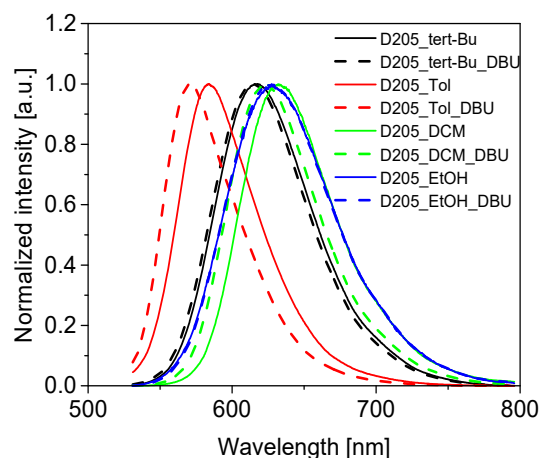

**Figure S6.** Fluorescence spectra of D205 in different organic solvents ( $c \sim 10^{-5}$  M) with or without addition of DBU;  $\lambda_{\text{exc}} = 525$  nm.

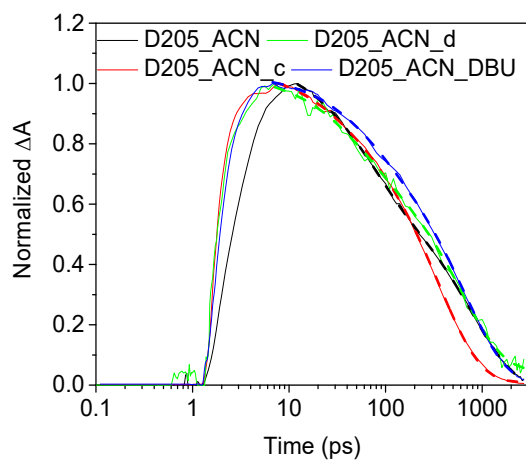

**Figure S7.** Transient absorption kinetics at 600 nm for D205 in ACN solution at the different dye concentrations and after DBU addition. Dashed line: 2-exp fit of the selected kinetics. The lifetime given in Table 3 is calculated as the amplitude-weighted average of both components.

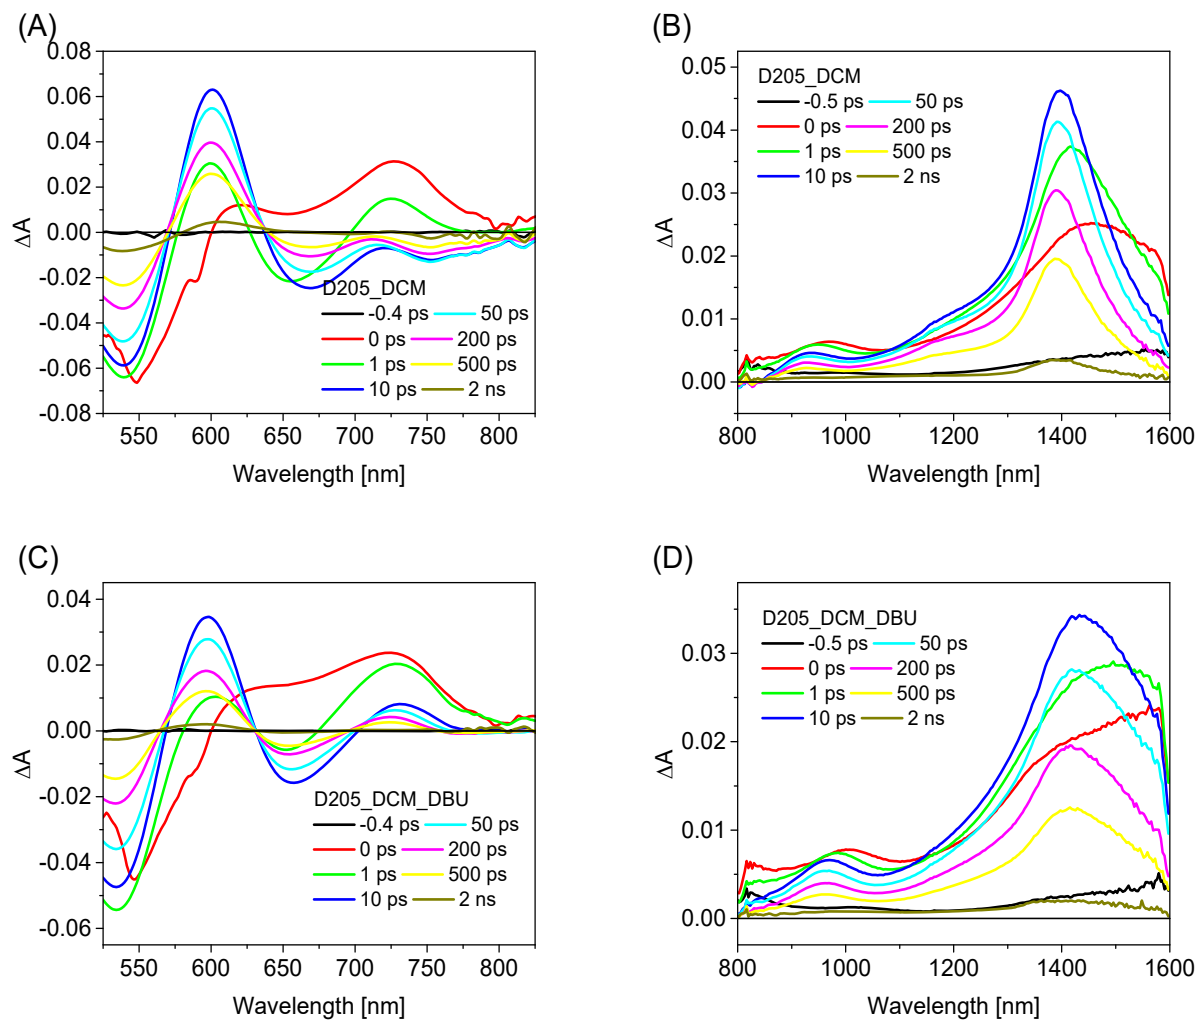

**Figure S8.** Representative transient absorption spectra for selected time delays between pump and probe pulse of D205 in DCM solution and after DBU addition (A,C – VIS; B,D – NIR).

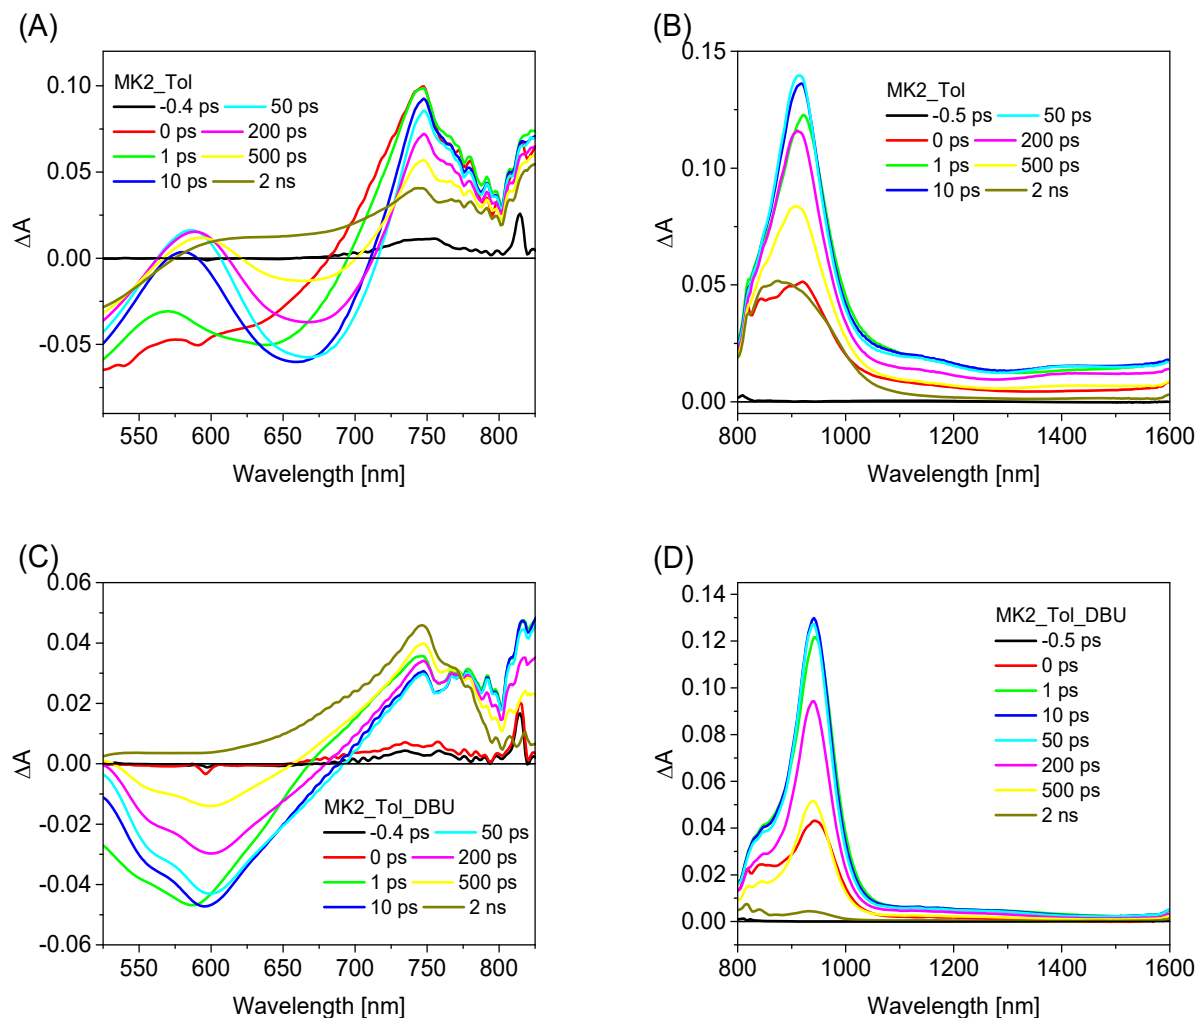

**Figure S9.** Representative transient absorption spectra for selected time delays between pump and probe pulse of MK2 in Tol solution and after DBU addition (**A,C** – VIS; **B,D** – NIR).

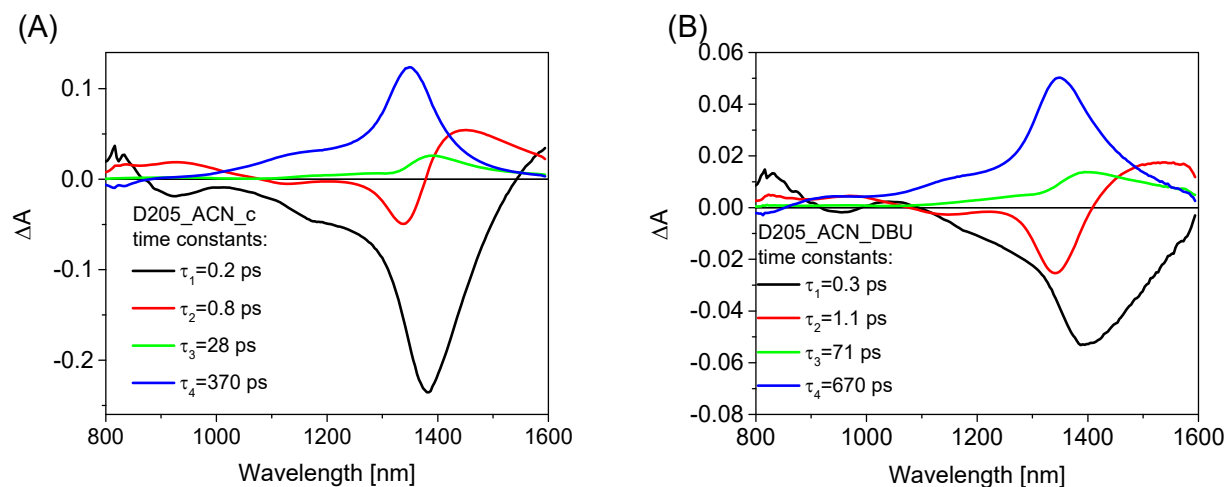

**Figure S10.** The wavelength-dependent amplitudes of the fitted components and the corresponding time constants of the D205 in ACN at  $10^{-4}$  M (**A**) and DBU addition (**B**) in NIR range.

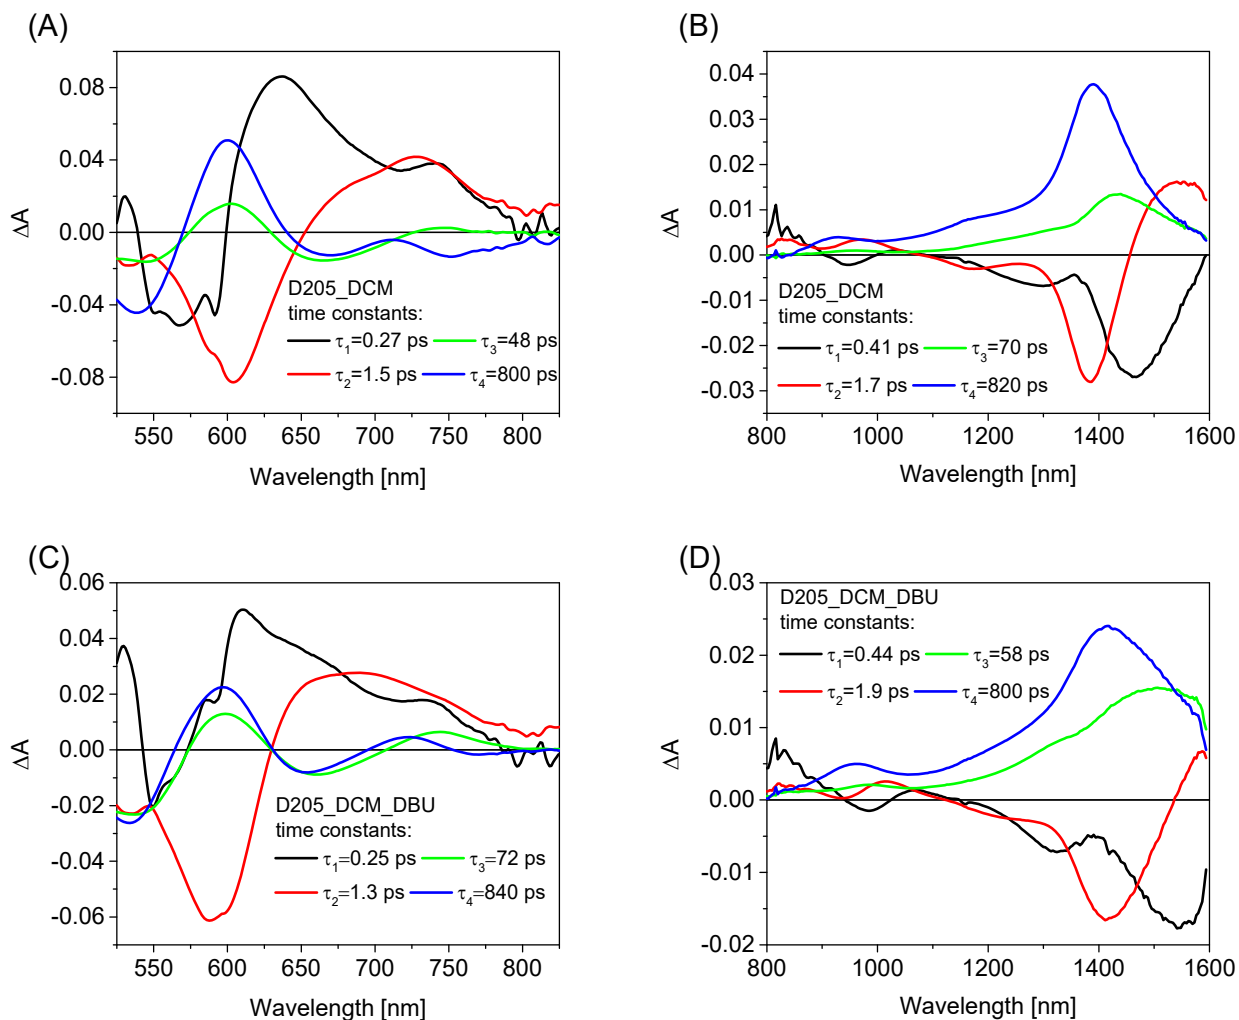

**Figure S11.** The wavelength-dependent amplitudes of the fitted components (4-exponential fit) and the corresponding time constants of the D205 in DCM and after DBU addition (**A,C**: VIS, **B,D**: NIR).



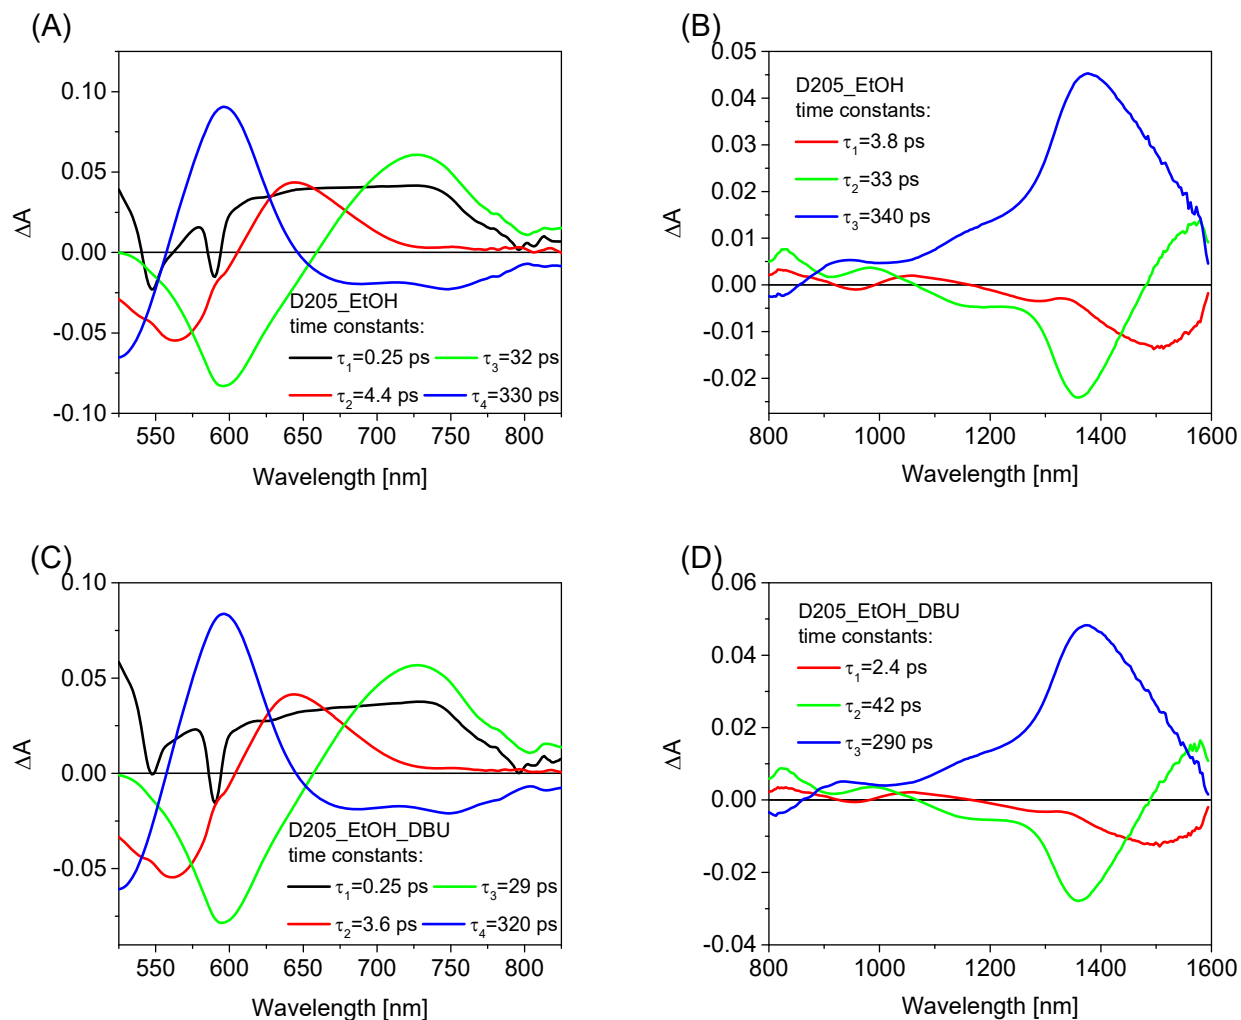

**Figure S12.** The wavelength-dependent amplitudes of the fitted components (4-exponential fit) and the corresponding time constants of the D205 in EtOH and after DBU addition (**A,C**: VIS, **B,D**: NIR).

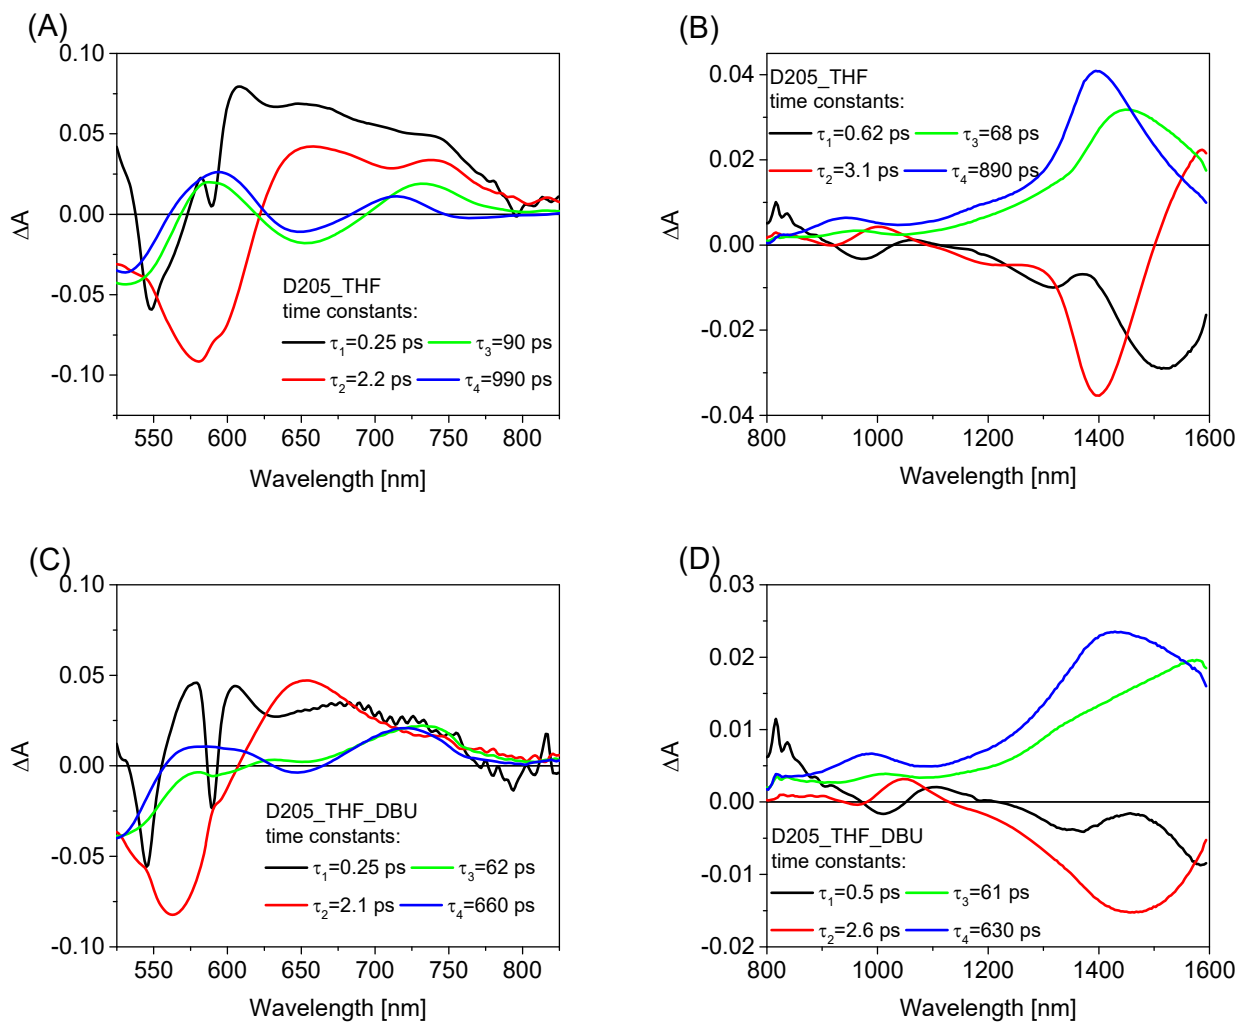

**Figure S13.** The wavelength-dependent amplitudes of the fitted components and the corresponding time constants of the D205 in THF and after DBU addition (A,C: VIS, B,D: NIR).

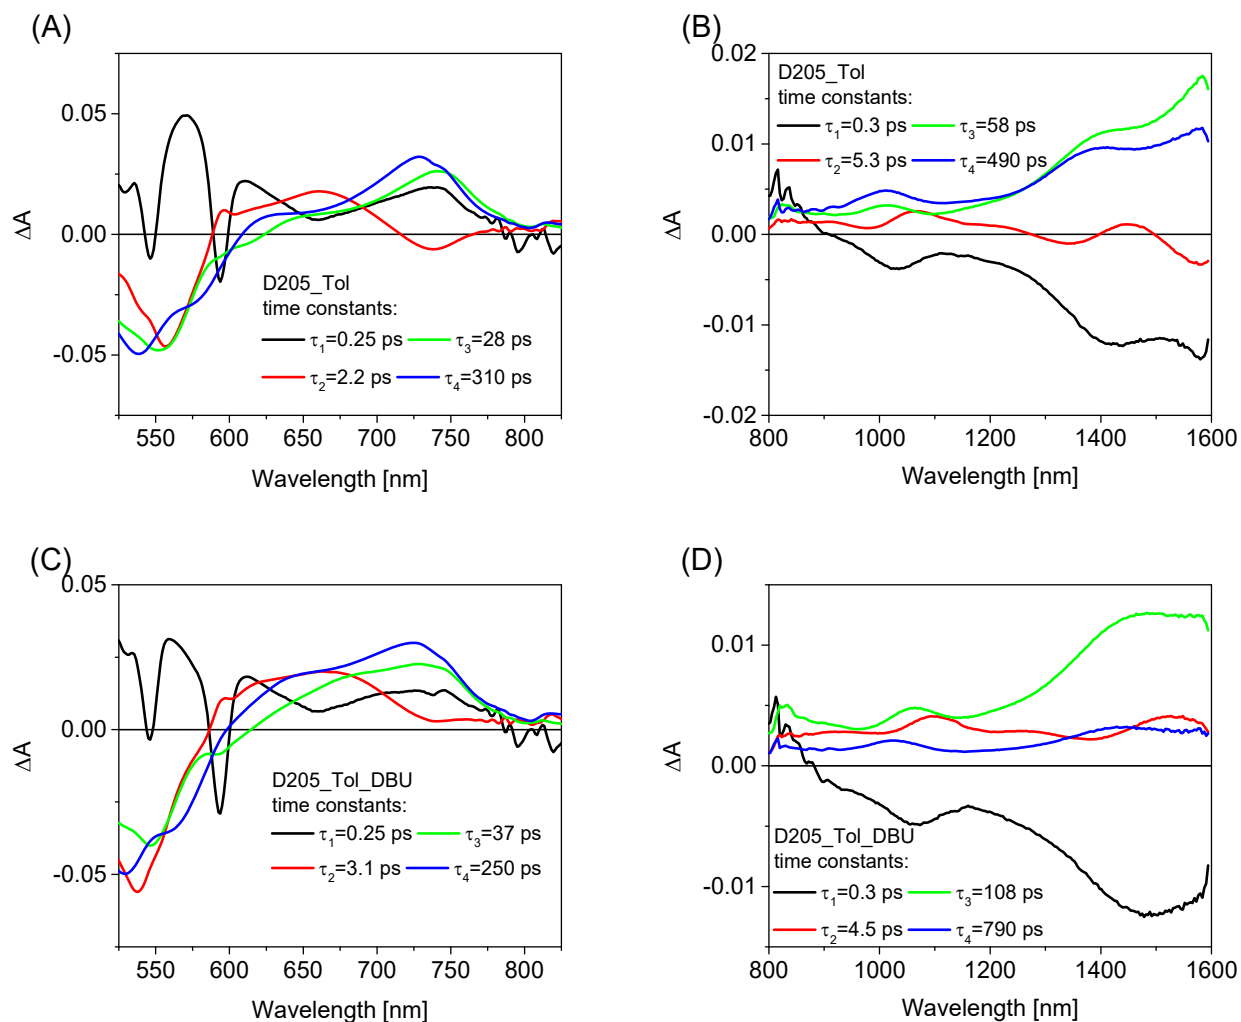

**Figure S14.** The wavelength-dependent amplitudes of the fitted components (4-exponential fit with the fitted fastest component) and the corresponding time constants of the D205 in Tol and after DBU addition (**A,C**: VIS, **B,D**: NIR).

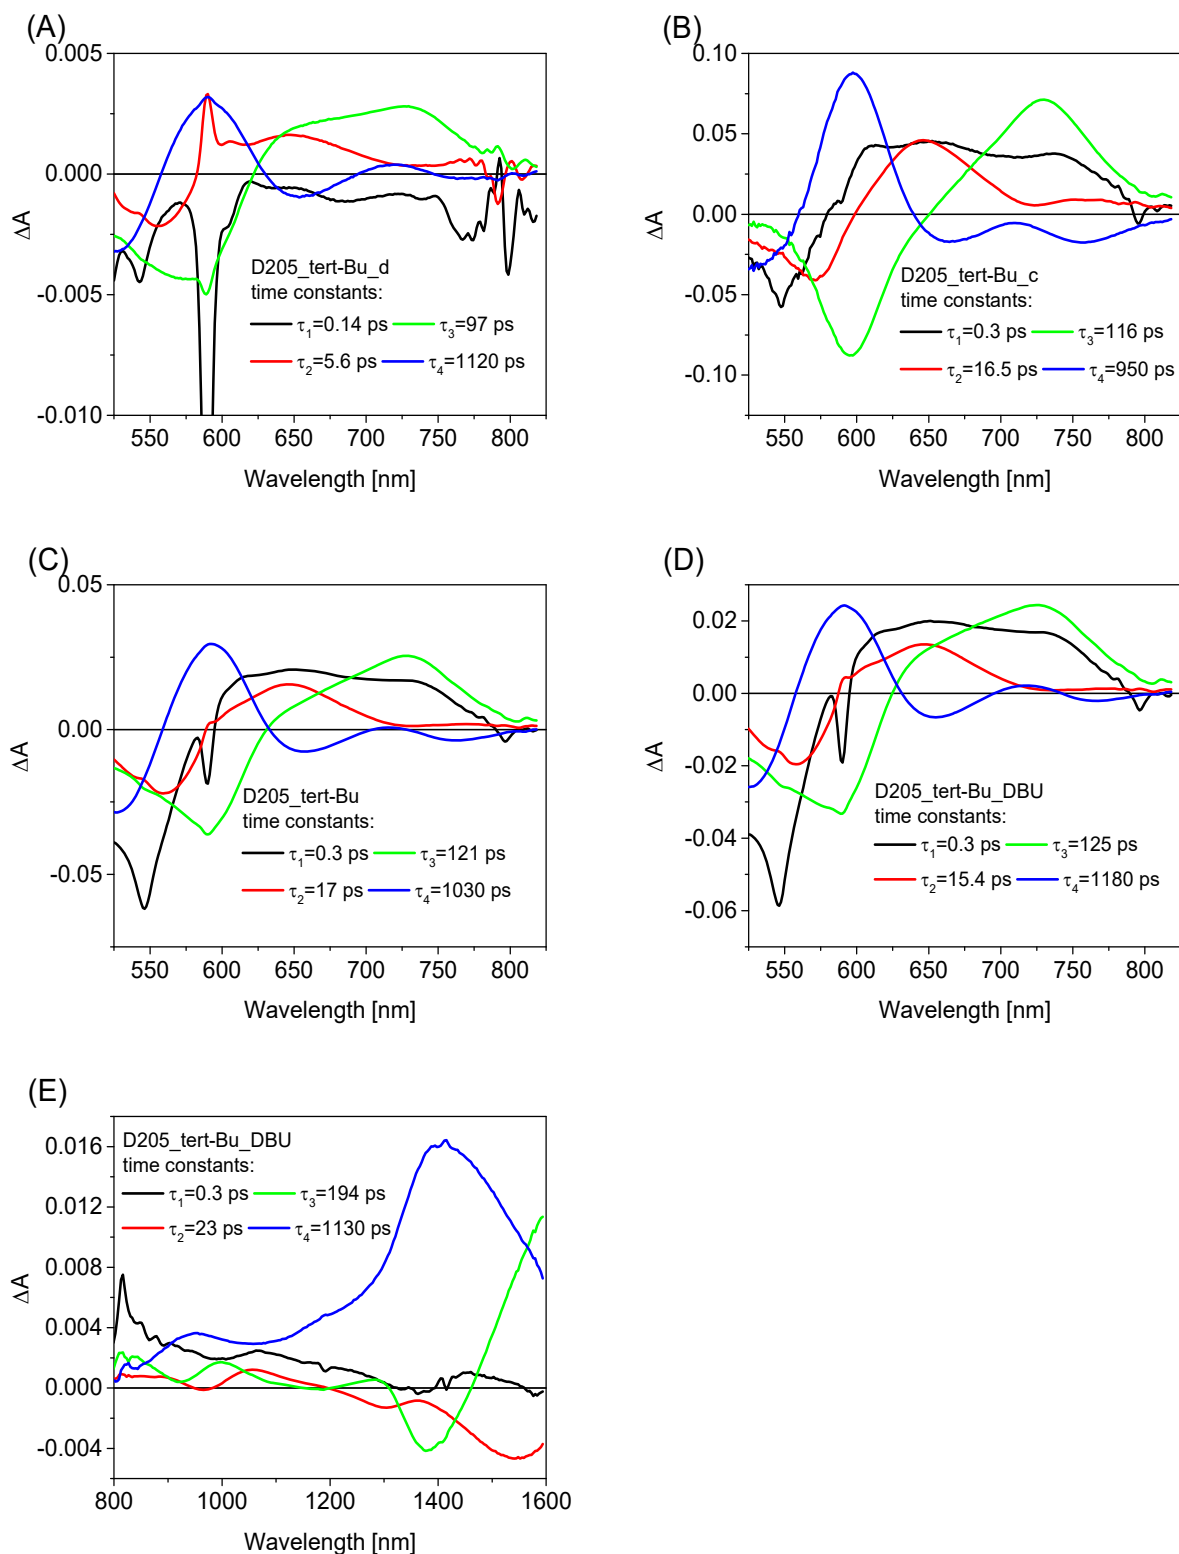

**Figure S15.** The wavelength-dependent amplitudes of the fitted components (4-exponential fit with the fitted fastest component) and the corresponding time constants of the D205 in tert-Bu at the different dye concentrations and after DBU addition (A-D: VIS, E: NIR).

**Table S7.** Theoretical results obtained for D205 and D205<sup>-</sup> using the CPCM solvation model with EtOH, ACN, DCM and Tol as solvents. Results for MK2 in a vacuum using different theory levels and the CPCM solvation model with Tol as a solvent (MK2 and MK2<sup>-</sup>)

| Method                                            | HOMO (eV) | LUMO (eV) | $\lambda$ (nm) | $f$    | Coeff                                |
|---------------------------------------------------|-----------|-----------|----------------|--------|--------------------------------------|
| D205 (EtOH)                                       | -5.144    | -2.581    | 551.6          | 0.9329 | 0.70204                              |
| D205 <sup>-</sup> (EtOH)                          | -5.017    | -2.341    | 530.9          | 1.0275 | 0.69899                              |
| D205 (ACN)                                        | -5.143    | -2.585    | 551.8          | 0.9263 | 0.70216                              |
| D205 <sup>-</sup> (ACN)                           | -5.038    | -2.375    | 532.5          | 1.0161 | 0.69962                              |
| D205 (DCM)                                        | -5.148    | -2.564    | 549.3          | 0.9604 | 0.70151                              |
| D205 <sup>-</sup> (DCM)                           | -4.883    | -2.147    | 524.9          | 0.9686 | 0.68641                              |
| D205 (Tol)                                        | -5.153    | -2.494    | 536.2          | 1.0269 | 0.70027                              |
| D205 <sup>-</sup> (Tol)                           | -4.865    | -2.340    | 514.2          | 0.0510 | 0.68355                              |
| MK2 in vacuum // Tol (CPCM), neutral forms        |           |           |                |        |                                      |
| MK2<br>b3lyp/6-31G(d)                             | -4.840    | -2.528    | 506.2          | 1.4239 | 0.70451                              |
| MK2<br>b3lyp/6-31G(d,p)                           | -4.842    | -2.531    | 503.8          | 1.4465 | 0.70449                              |
| MK2<br>pbe1pbe/6-31G(d)                           | -5.091    | -2.442    | 544.8          | 1.4702 | 0.69827                              |
| MK2<br>cam-b3lyp/6-31G(d)                         | -6.290    | -1.376    | 388.8          | 1.5744 | 0.42957<br>(H→L),<br>0.44784 (H-1→L) |
| MK2<br>b3lyp/6-31G(d),<br>Tol (CPCM)              | -4.865    | -2.624    | 491.1          | 1.6786 | 0.70211                              |
| MK2 <sup>-</sup><br>b3lyp/6-31G(d),<br>Tol (CPCM) | -3.910    | -1.177    | 431.1          | 1.0434 | 0.69078                              |

**Table S8.** Calculated [b3lyp/6-31G(d)] singlet excitation energies with the corresponding oscillator strengths  $f$  starting from optimized geometry of the ground states of D205 and MK2 using the CPCM solvation model with ACN, EtOH, DCM (D205) and Tol (D205 and MK2) as solvents.

| $S_0 \rightarrow S_i$ | D205_ACN                                 |        | D205_EtOH                                |        | D205_DCM                                 |        | D205_Tol                                 |        | MK2_Tol                                  |        |
|-----------------------|------------------------------------------|--------|------------------------------------------|--------|------------------------------------------|--------|------------------------------------------|--------|------------------------------------------|--------|
|                       | $E \times 10^{-3}$<br>/ cm <sup>-1</sup> | $f$    |
| $\rightarrow S_1$     | 18.1                                     | 0.9263 | 18.1                                     | 0.9329 | 18.2                                     | 0.9604 | 18.7                                     | 1.0269 | 20.4                                     | 1.6786 |
| $\rightarrow S_2$     | 23.1                                     | 0.4984 | 23.1                                     | 0.4982 | 23.2                                     | 0.4963 | 23.3                                     | 0.4744 | 21.0 <sup>†</sup>                        | 0.0009 |
| $\rightarrow S_3$     | 24.8                                     | 0.362  | 24.8                                     | 0.3662 | 24.9                                     | 0.3823 | 24.4 <sup>†</sup>                        | 0.0006 | 22.2                                     | 0.2822 |
| $\rightarrow S_4$     | 25.3 <sup>†</sup>                        | 0.0008 | 25.2 <sup>†</sup>                        | 0.0007 | 25.0 <sup>†</sup>                        | 0.0006 | 25.4                                     | 0.4277 | 24.7 <sup>†</sup>                        | 0.0006 |
| $\rightarrow S_5$     | 26.7                                     | 0.5710 | 26.6                                     | 0.5699 | 26.6                                     | 0.5626 | 26.7                                     | 0.5141 | 26.4                                     | 0.0180 |
| $\rightarrow S_6$     | 27.9                                     | 0.0733 | 28.0                                     | 0.0731 | 28.0                                     | 0.0694 | 28.2                                     | 0.0402 | 27.1                                     | 0.0134 |
| $\rightarrow S_7$     | 30.0 <sup>†</sup>                        | 0.0003 | 30.0 <sup>†</sup>                        | 0.0009 | 30.0 <sup>†</sup>                        | 0.0009 | 30.2                                     | 0.0064 | 27.9                                     | 0.0550 |
| $\rightarrow S_8$     | 31.3                                     | 0.0279 | 31.3                                     | 0.0276 | 31.4                                     | 0.0253 | 31.5 <sup>†</sup>                        | 0.0006 | 28.2                                     | 0.0239 |
| $\rightarrow S_9$     | 31.7                                     | 0.0059 | 31.7 <sup>†</sup>                        | 0.0005 | 31.8                                     | 0.0111 | 31.6                                     | 0.0146 | 30.3                                     | 0.0890 |
| $\rightarrow S_{10}$  | 31.8 <sup>†</sup>                        | 0.0005 | 31.8 <sup>†</sup>                        | 0.0016 | 31.9 <sup>†</sup>                        | 0.0003 | 32.2                                     | 0.1252 | 31.0                                     | 0.0265 |
| $\rightarrow S_{11}$  | 32.5                                     | 0.0728 | 32.5                                     | 0.0730 | 32.3 <sup>†</sup>                        | 0.0001 | 32.4                                     | 0.0052 | 31.1                                     | 0.0218 |
| $\rightarrow S_{12}$  | 32.6 <sup>†</sup>                        | 0.0002 | 32.6                                     | 0.0187 | 32.5                                     | 0.1367 | 32.4                                     | 0.0926 | 31.3                                     | 0.0519 |
| $\rightarrow S_{13}$  | 32.6                                     | 0.0031 | 32.6                                     | 0.0176 | 32.6 <sup>†</sup>                        | 0.0001 | 32.8                                     | 0.0138 | 31.5                                     | 0.0303 |
| $\rightarrow S_{14}$  | 32.7                                     | 0.1577 | 32.7                                     | 0.1493 | 32.7                                     | 0.0961 | 33.0                                     | 0.0111 | 31.7                                     | 0.0373 |
| $\rightarrow S_{15}$  | 33.0                                     | 0.0313 | 33.0                                     | 0.0278 | 33.0                                     | 0.0078 | 33.1 <sup>†</sup>                        | 0.0001 | 32.2                                     | 0.0825 |

<sup>†</sup>  $n, \pi^*$  transition, otherwise  $\pi, \pi^*$ .

**Table S9.** Calculated [b3lyp/6-31G(d)] singlet excitation energies with the corresponding oscillator strengths  $f$  starting from optimized geometry of the ground states of D205<sup>-</sup> and MK2<sup>-</sup> using the CPCM solvation model with ACN, EtOH, DCM (D205) and Tol (D205 and MK2) as solvents.

| $S_0 \rightarrow S_i$ | D205 <sup>-</sup> _ACN                   |        | D205 <sup>-</sup> _EtOH                  |        | D205 <sup>-</sup> _DCM                   |        | D205 <sup>-</sup> _Tol                   |        | MK2 <sup>-</sup> _Tol                    |        |
|-----------------------|------------------------------------------|--------|------------------------------------------|--------|------------------------------------------|--------|------------------------------------------|--------|------------------------------------------|--------|
|                       | $E \times 10^{-3}$<br>/ cm <sup>-1</sup> | $f$    |
| $\rightarrow S_1$     | 18.8                                     | 1.0161 | 18.8                                     | 1.0275 | 19.1                                     | 0.9686 | 19.4                                     | 0.0510 | 23.2                                     | 1.0434 |
| $\rightarrow S_2$     | 21.4                                     | 0.0325 | 21.2                                     | 0.0269 | 20.1                                     | 0.0379 | 20.6                                     | 1.2376 | 23.5 <sup>†</sup>                        | 0.0007 |
| $\rightarrow S_3$     | 21.8                                     | 0.0523 | 21.6                                     | 0.0540 | 20.6                                     | 0.1573 | 21.7                                     | 0.0304 | 23.7                                     | 0.6127 |
| $\rightarrow S_4$     | 24.1                                     | 0.3693 | 24.1                                     | 0.3564 | 23.3                                     | 0.0109 | 22.6                                     | 0.0110 | 23.9 <sup>†</sup>                        | 0.0002 |
| $\rightarrow S_5$     | 24.9                                     | 0.0193 | 24.7                                     | 0.0305 | 24.3                                     | 0.3331 | 24.4                                     | 0.0217 | 25.2                                     | 0.0052 |
| $\rightarrow S_6$     | 25.5                                     | 0.5701 | 25.6                                     | 0.5965 | 25.4 <sup>†</sup>                        | 0.0008 | 24.8                                     | 0.0709 | 25.3                                     | 0.0354 |
| $\rightarrow S_7$     | 25.7 <sup>†</sup>                        | 0.0002 | 25.7                                     | 0.0094 | 25.6                                     | 0.7369 | 24.9 <sup>†</sup>                        | 0.0001 | 26.1                                     | 0.0745 |
| $\rightarrow S_8$     | 26.9                                     | 0.3289 | 27.0                                     | 0.2937 | 27.0                                     | 0.1126 | 25.0                                     | 0.0284 | 26.8                                     | 0.0392 |
| $\rightarrow S_9$     | 28.3                                     | 0.0132 | 28.4                                     | 0.0167 | 27.6 <sup>†</sup>                        | 0.0005 | 25.1                                     | 0.6790 | 27.2                                     | 0.0046 |
| $\rightarrow S_{10}$  | 28.8                                     | 0.0048 | 28.7                                     | 0.0055 | 28.0                                     | 0.0063 | 25.2                                     | 0.0401 | 28.1 <sup>†</sup>                        | 0.0004 |
| $\rightarrow S_{11}$  | 29.3 <sup>†</sup>                        | 0.0009 | 29.1 <sup>†</sup>                        | 0.0009 | 28.6                                     | 0.0798 | 27.4 <sup>†</sup>                        | 0.0005 | 28.3 <sup>†</sup>                        | 0.0008 |
| $\rightarrow S_{12}$  | 31.2                                     | 0.1092 | 31.1                                     | 0.1196 | 30.0                                     | 0.0391 | 28.7                                     | 0.0337 | 28.5                                     | 0.0162 |
| $\rightarrow S_{13}$  | 31.6                                     | 0.0259 | 31.5                                     | 0.0144 | 30.7                                     | 0.0324 | 28.7                                     | 0.2029 | 29.9                                     | 0.0124 |
| $\rightarrow S_{14}$  | 31.9                                     | 0.0318 | 31.9                                     | 0.0183 | 30.8 <sup>†</sup>                        | 0.0004 | 31.0 <sup>†</sup>                        | 0.0002 | 30.2                                     | 0.0111 |
| $\rightarrow S_{15}$  | 32.3                                     | 0.0055 | 32.2 <sup>†</sup>                        | 0.0007 | 31.3                                     | 0.039  | 31.7                                     | 0.0514 | 30.2                                     | 0.0278 |

<sup>†</sup>  $n, \pi^*$  transition, otherwise  $\pi, \pi^*$ .

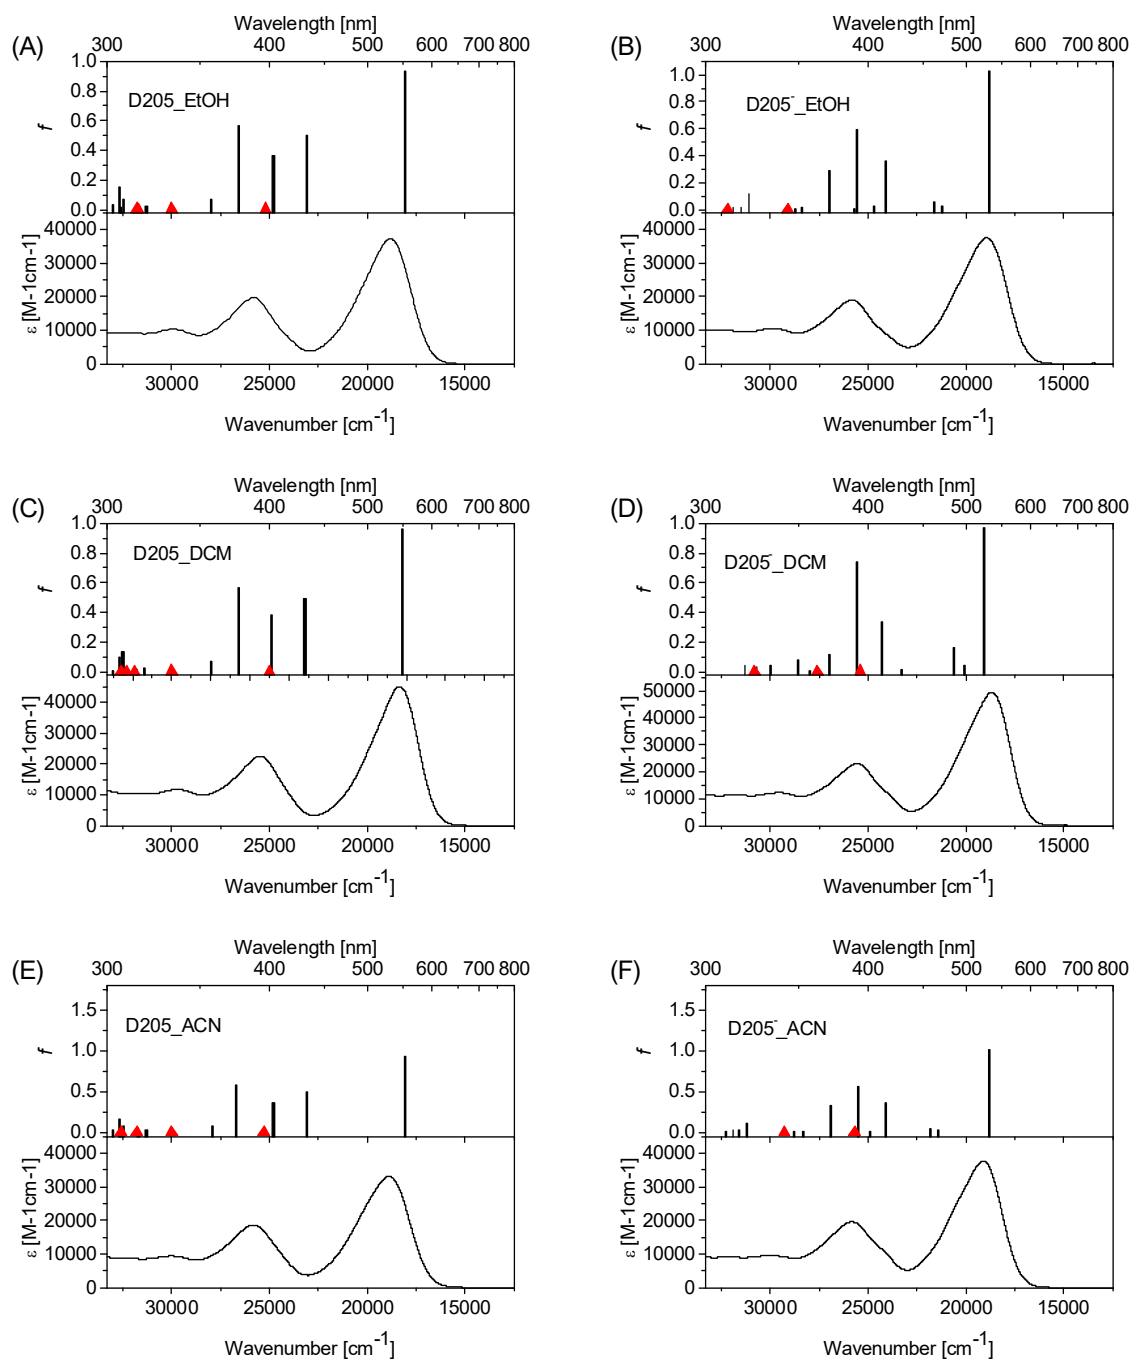

**Figure S16.** Absorption spectra of D205 (neutral; A, C, E) and D205<sup>-</sup> (anion; B, D, F) in EtOH (A,B), DCM (C,D) and ACN (E,F). Predicted transition energies and oscillator strengths  $f$  are indicated by solid vertical lines. The (prohibited) transitions involving the  $n,\pi^*$  singlet states are marked by red triangles. All theoretical results were determined at the b3lyp/6-31G(d) level of theory.



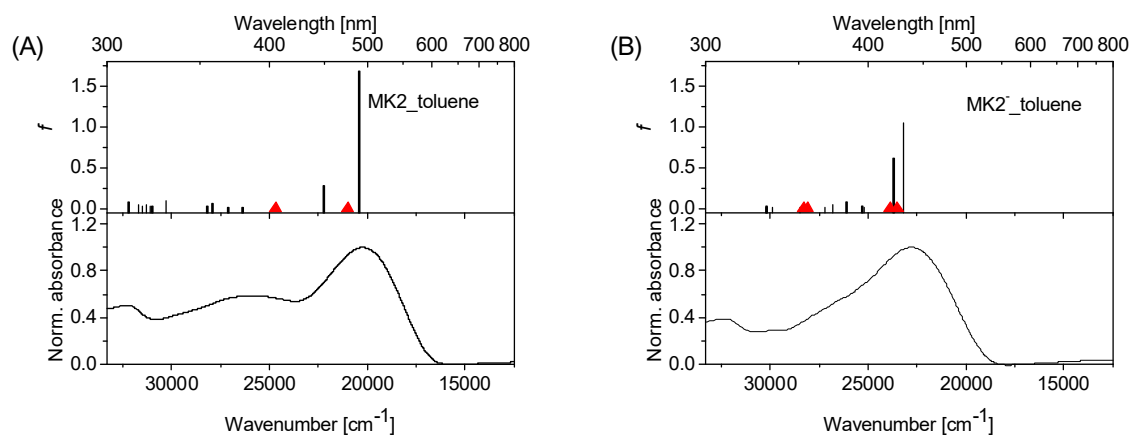

**Figure S17.** Absorption spectra of MK2 (neutral; A) and MK2<sup>-</sup> (anion; B) in Tol. Predicted transition energies and oscillator strengths  $f$  are indicated by solid vertical lines. The (prohibited) transitions involving the  $n,\pi^*$  singlet states are marked by red triangles. All theoretical results were determined at the b3lyp/6-31G(d) level of theory.

| Dye      | States             | Dominate transitions      | FMOs                                                                                |   |                                                                                      |
|----------|--------------------|---------------------------|-------------------------------------------------------------------------------------|---|--------------------------------------------------------------------------------------|
| D205_ACN | H→L                | ICT +<br>( $\pi, \pi^*$ ) | 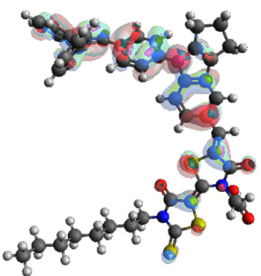   | → |    |
|          | H <sup>-1</sup> →L | ICT +<br>( $\pi, \pi^*$ ) |    | → |    |
|          | H→L <sup>+1</sup>  | ICT +<br>( $\pi, \pi^*$ ) |   | → |   |
|          | H <sup>-2</sup> →L | ICT +<br>( $\pi, \pi^*$ ) |  | → |  |
|          | H <sup>-3</sup> →L | ICT +<br>( $n, \pi^*$ )   |  | → |  |

|               |                             |                         |   |                                                                                   |   |                                                                                    |
|---------------|-----------------------------|-------------------------|---|-----------------------------------------------------------------------------------|---|------------------------------------------------------------------------------------|
|               | $H^{-3} \rightarrow L^{+1}$ | ICT<br>( $n, \pi^*$ )   | + | 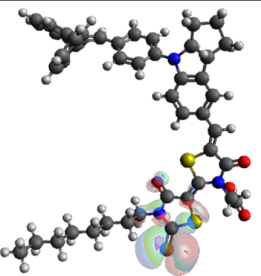 | → |  |
| D205-<br>_ACN | $H \rightarrow L$           | ICT<br>( $\pi, \pi^*$ ) | + |  | → |  |

**Figure S18.** The shape of the HOMO and the LUMO of D205\_ACN and D205-ACN at the b3lyp/6-31G(d) theory level responsible for the  $S_0 \rightarrow S_1$  electronic transition determined as isodensity surface plots. The  $H^{-n}$ ,  $L^{+m}$  ( $\pi, \pi^*$ ) and ( $n, \pi^*$ ) are representatives of the nth, mth HOMO and LUMO states, respectively (for D205\_ACN).

| Dye     | States             | Dominate transitions  | FMOs                                                                                |   |                                                                                      |
|---------|--------------------|-----------------------|-------------------------------------------------------------------------------------|---|--------------------------------------------------------------------------------------|
| MK2_Tol | H→L                | LE + ( $\pi, \pi^*$ ) | 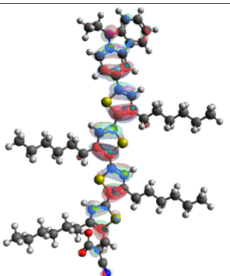   | → |    |
|         | H <sup>-1</sup> →L | LE + ( $n, \pi^*$ )   |    | → |    |
|         | H→L <sup>+1</sup>  | LE + ( $n, \pi^*$ )   |   | → |   |
|         | H <sup>-2</sup> →L | LE + ( $\pi, \pi^*$ ) |  | → |  |
| MK2_Tol | H→L                | LE + ( $\pi, \pi^*$ ) |  | → |  |

**Figure S19.** The shape of the HOMO and the LUMO of MK2\_Tol and MK2\_Tol at the b3lyp/6-31G(d) theory level responsible for the  $S_0 \rightarrow S_1$  electronic transition determined as isodensity surface plots. The H<sup>-n</sup>, L<sup>+m</sup> ( $\pi, \pi^*$ ) and ( $n, \pi^*$ ) are representatives of the nth, mth HOMO and LUMO states, respectively (for MK2\_Tol).

#### *DSSC characterization:*

A UV-VIS-NIR JASCO V-770 spectrophotometer equipped with a 150 mm integrating sphere (LN-925) was used to measure the stationary absorption spectra of photoanodes, after sensitization by MK2 and/or D205 dyes, in the UV-VIS range. The samples were mounted in front of the integrating sphere in order to detect both transmitted and scattered light. Absorption spectra were recorded in the spectral range from 350 nm to 850 nm with a UV-VIS bandwidth of 1 nm. The baselines for the unsensitized TiO<sub>2</sub> electrodes were measured and subtracted from the absorption spectra of the photoanodes sensitized by the dyes. Current-voltage measurements and IPCE (incident photon to current efficiency) spectra of the studied solar cells were recorded using a potentiostat (model M101 with an FRA32M frequency response analyzer module, Autolab) coupled to a photoelectric spectrometer, equipped with a solar simulator (Photon Institute, Poland). Current-voltage measurements were made one hour after cell preparation completion. The photovoltaic parameters presented in the tables are usually averaged over 3 or more samples of the same series. For a few configurations only two cells in the series were prepared, and the parameters for the better cell are shown in the indicated tables. A Xe lamp with an AM 1.5 G spectral filter and irradiance adjusted to 100 mW/cm<sup>2</sup> using a calibrated cell (15151, ABET) mimicked sunlight conditions. Corrected photocurrent efficiency (TotalAPCE) was calculated as the short-circuit current per the number of absorbed photons. This parameter is used to compare the charge transfer efficiency for the cells of different dye absorptions. The complete solar cells with thin TiO<sub>2</sub> layers were used for **transient absorption studies**. The transient absorption system has been described previously by us in more detail (Helios spectrometer, Ultrafast Systems, and Spectra Physics laser system). The laser pulses were set up at 470 nm, and the IRF (pump-probe cross correlation function) duration was about 200 fs (FWHM). The pump pulse energy was set to 150 nJ, which corresponds to an energy density of 75  $\mu\text{J cm}^{-1}$ . The transient absorption measurements were analyzed using the Surface Explorer software (Ultrafast Systems), including global analysis. The program allowed fitting a multi-exponential function (convoluted with IRF) to the kinetic vectors of a selected number of singular values. Finally, the characteristic time constants and the wavelength-dependent amplitudes associated with them were obtained.

**The stationary absorption spectra of MK2 and D205 dyes in solution** were measured using the same spectrophotometer (UV-VIS-NIR JASCO V-770) that was used to measure the spectra of photoanodes. In this case, an attachment was applied to measure absorption spectra in solutions. **Femtosecond transient absorption** measurements for D205 and MK2 solutions were made on the same Helios spectrometer, Ultrafast Systems, and Spectra Physics laser system which were used to measure the DSSCs. The laser pulses were set up at 505 nm, and the IRF (pump-probe cross correlation function) duration was about 200 fs (FWHM). The pump pulse energy was set to 1000 nJ, which corresponds to an energy density of 500  $\mu\text{J cm}^{-1}$ .
